# Supplementary material
Source: publisher figshare collection journal article supplement (https://frontiersin.figshare.com/ndownloader/files/15290429)

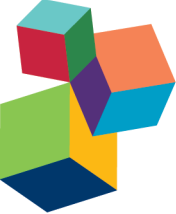

frontiers

Supplement: Supplementary file 1 [file 15290429]
